# Supplementary material for: Wave height return periods from combined measurement–model data: A Baltic Sea case study
Source: Copernicus journal article supplement (doi:10.5194/nhess-2020-190), 2020-06-29
Supplement: Supplementary file 1 [file nhess-2020-190-supplement.pdf]

## S1 Additional figures of fits to data

These Figures (Fig. S1–S6) are as Fig. 7 in the manuscript, but for different thresholds for the POT data and using WAM (instead of SWAN) as the primary wave hindcast. For an explanation of the different data sets (SWAN- $\chi^2$ , WAM-filtered etc.), please see Table 1 in the manuscript.

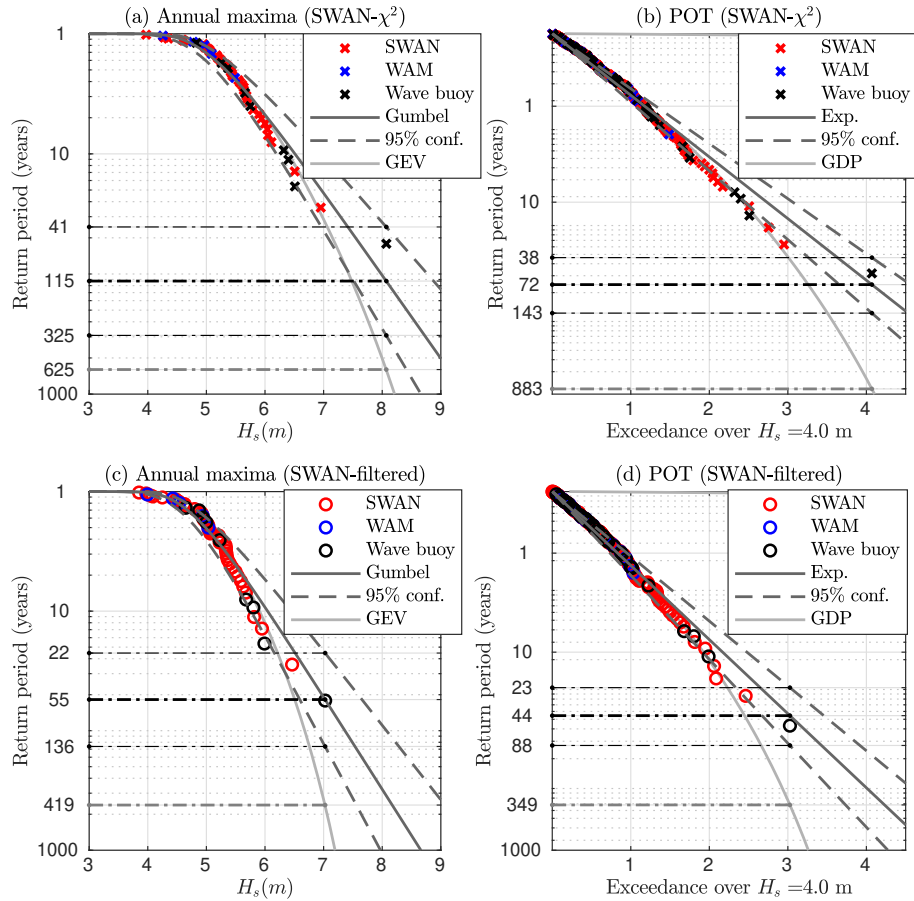

Figure S1: Fits to annual maxima and POT values (threshold  $u = 4.0$  m) of the SWAN data. The top panels are fits to the original observations and model values with an added synthetic  $\chi^2$ -variability. The bottom panels are fits to the original model data and low-pass filtered observations. In the top panels this single realisation of added  $\chi^2$ -variability has purposefully been chosen to closely match the ensemble averages in Table 3 of the manuscript.

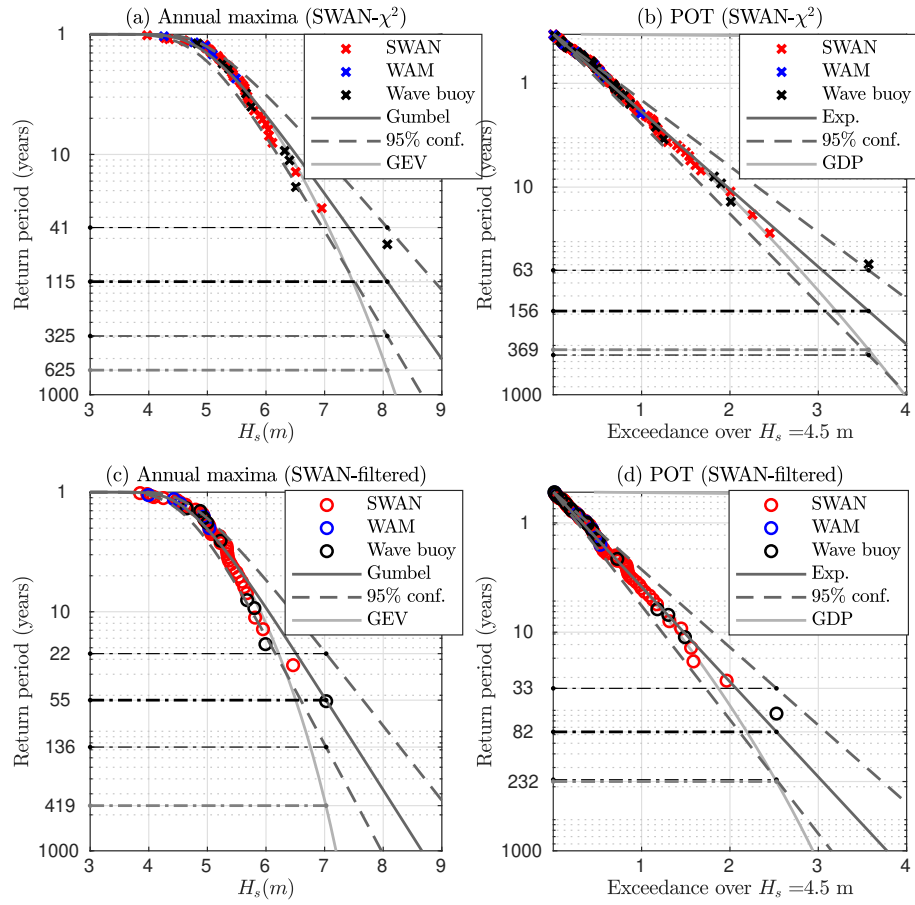

Figure S2: As for Figure S1 but with a threshold of  $u = 4.5$  m. This figure is identical to Fig. 7 in the manuscript.

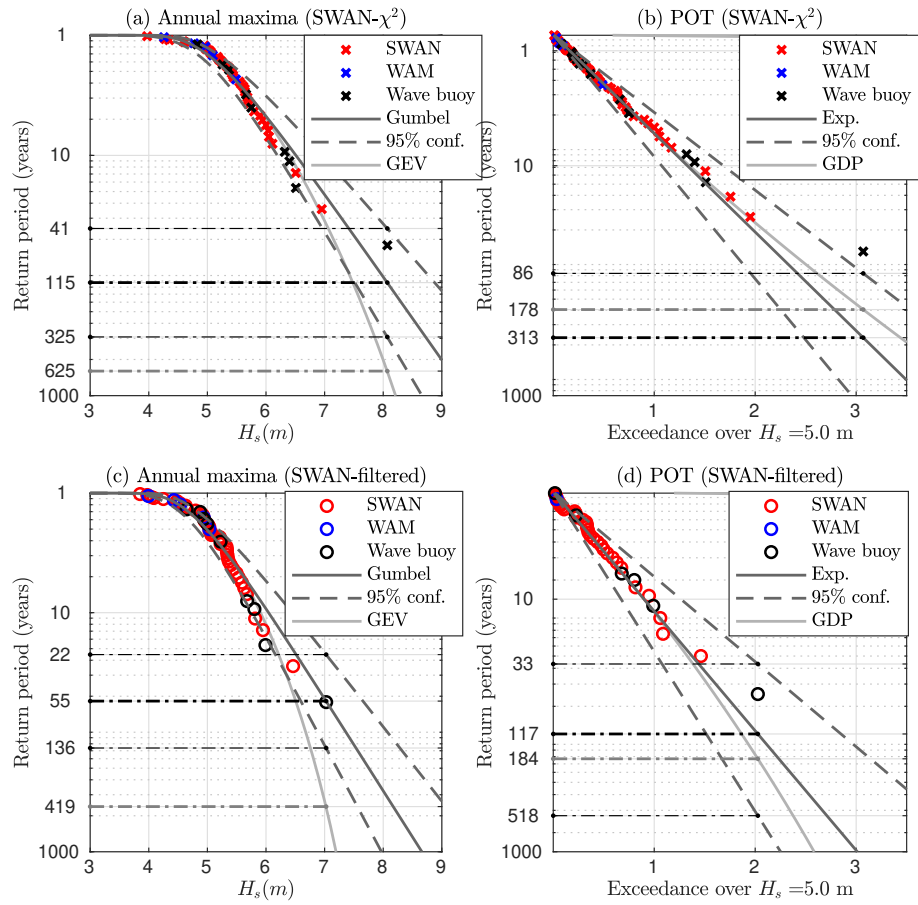

Figure S3: As for Figure S1 but with a threshold of  $u = 5.0$  m.

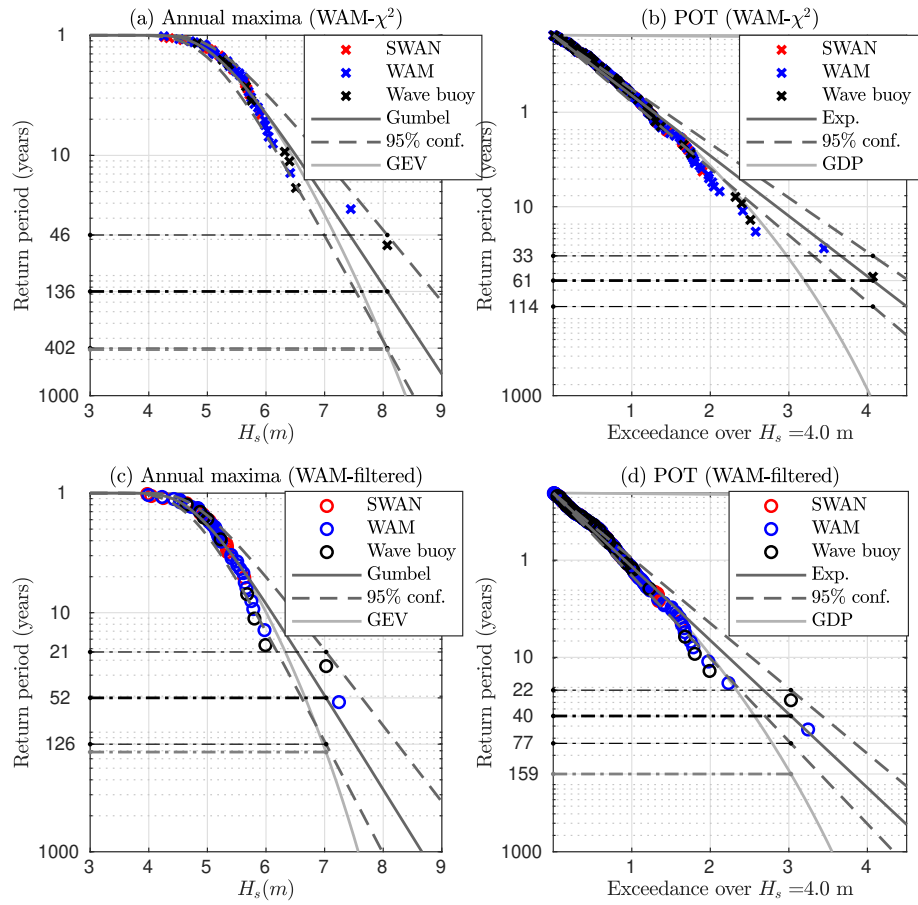

Figure S4: As for Figure S1 but for WAM data.

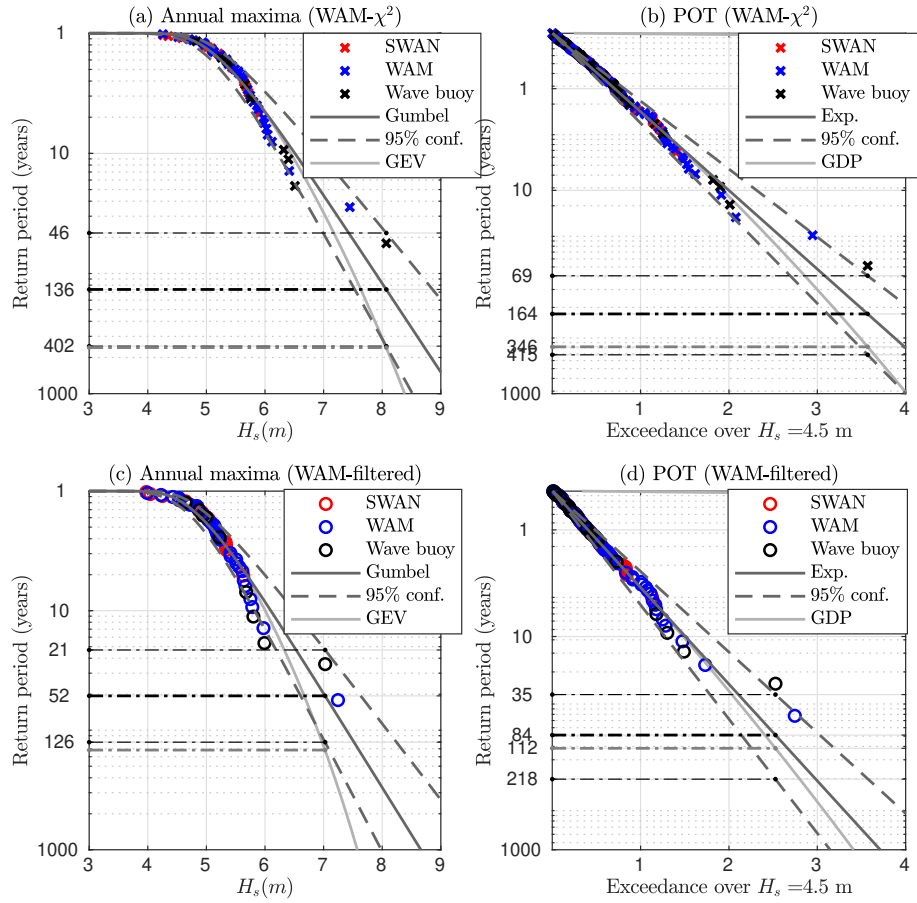

Figure S5: As for Figure S1 but for WAM data and with a threshold of  $u = 4.5$  m.

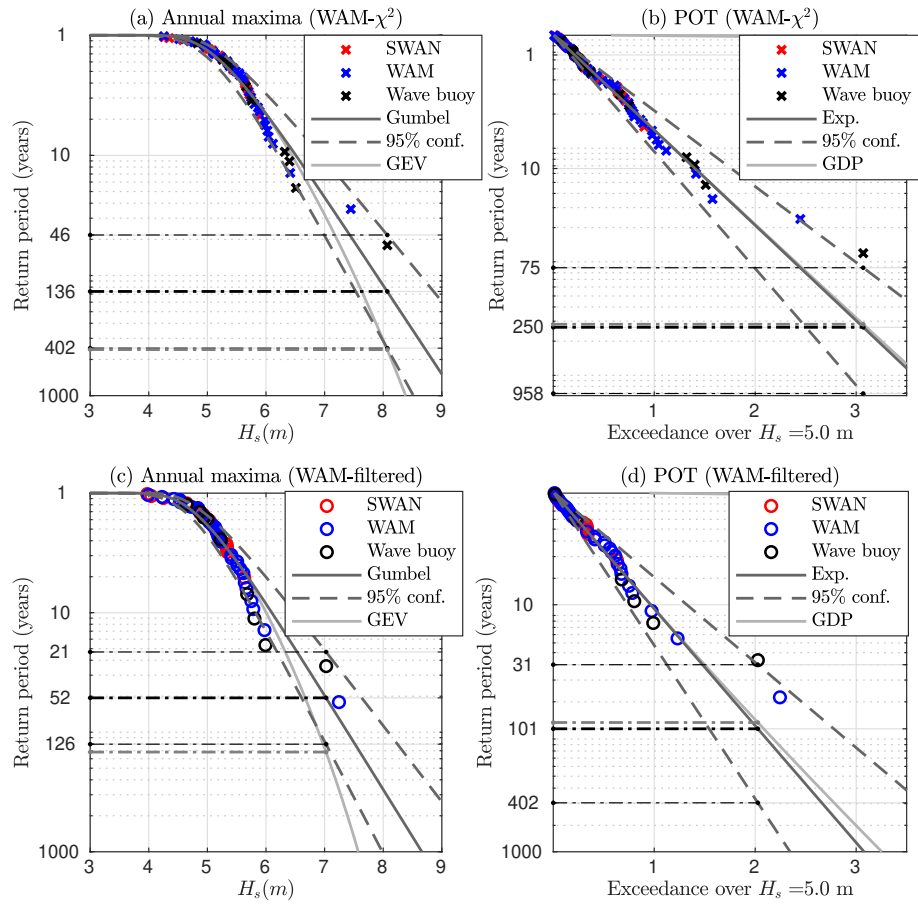

Figure S6: As for Figure S1 but for WAM data and with a threshold of  $u = 5.0$  m.
